# Supplementary material for: Cross-sectional association between blood cholesterol and calcium levels in genetically diverse strains of mice
Source: PubMed Central journal article supplement (PMC9934644; doi:10.1101/2023.02.08.527123), 2023-02-09

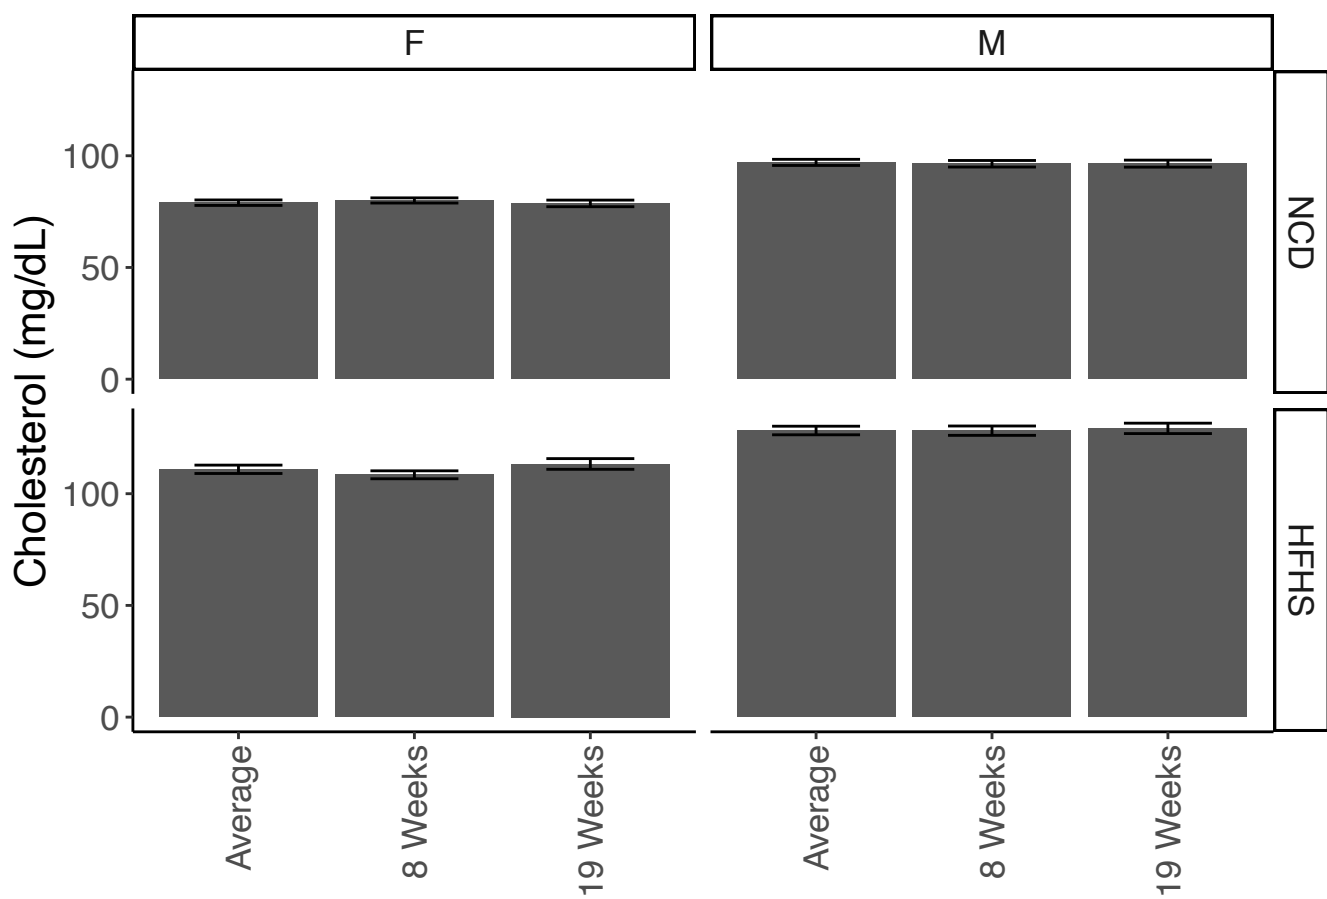

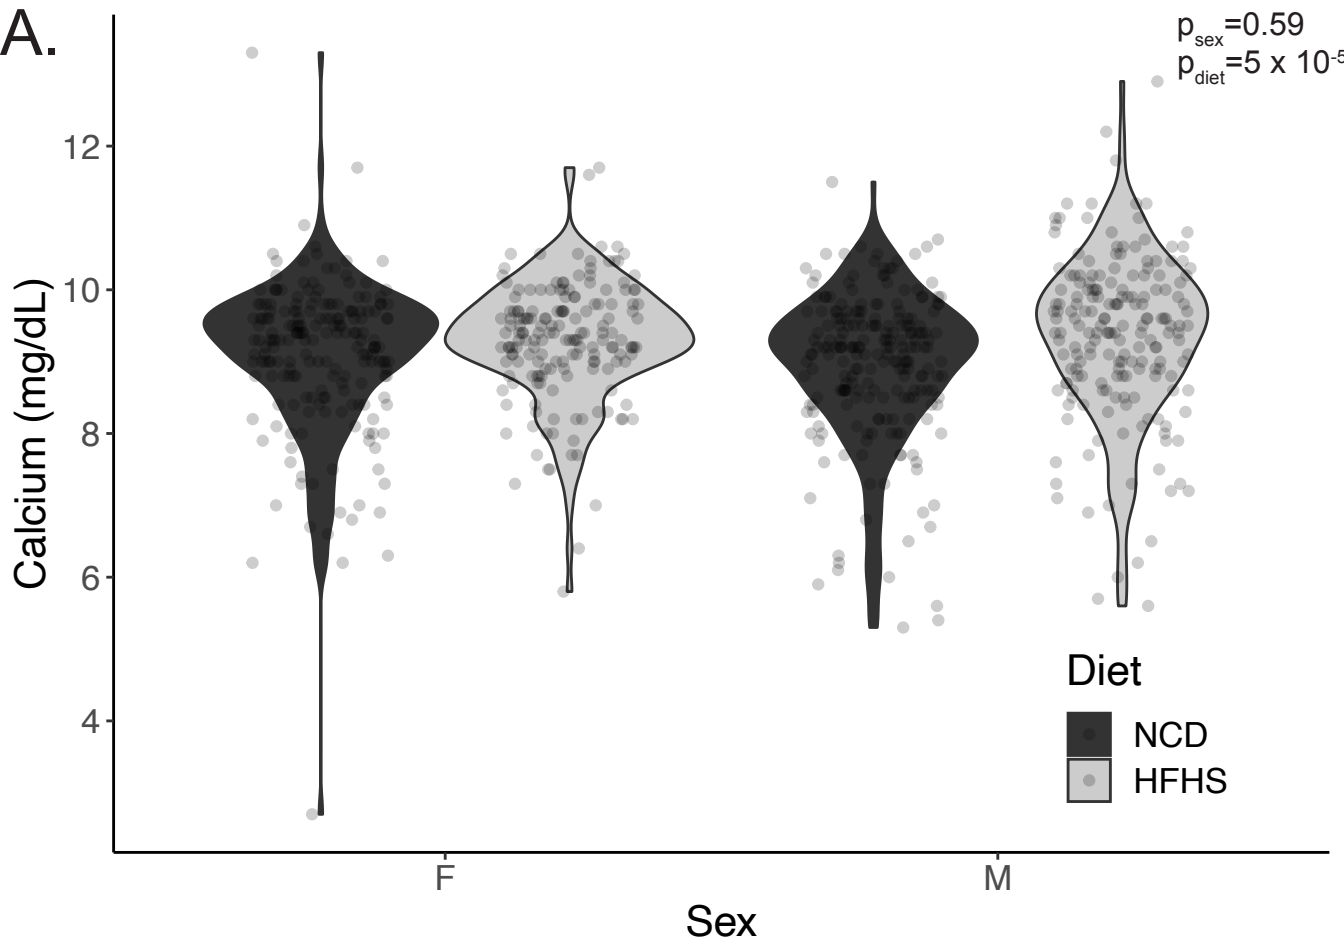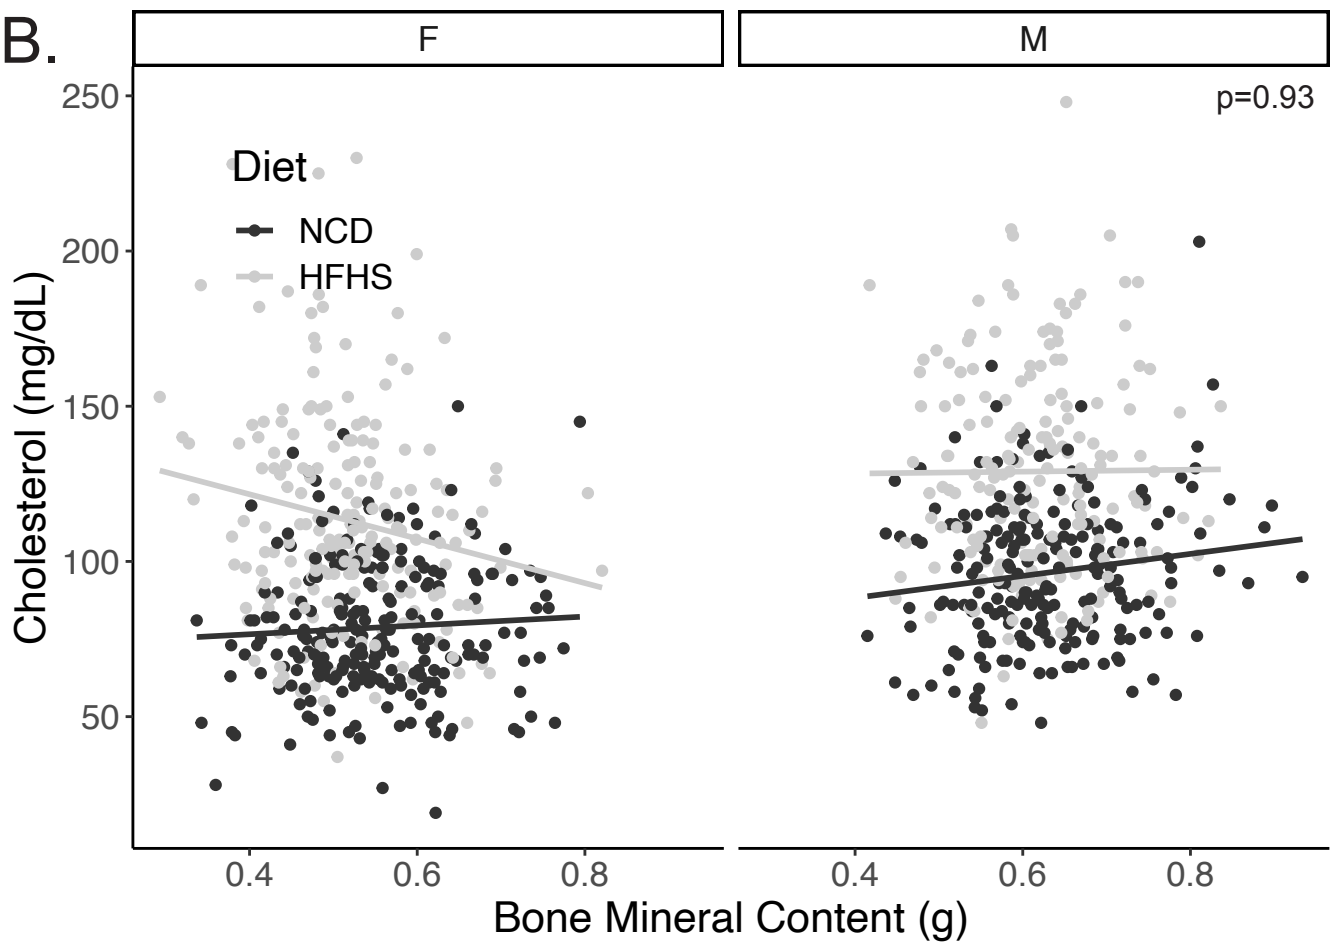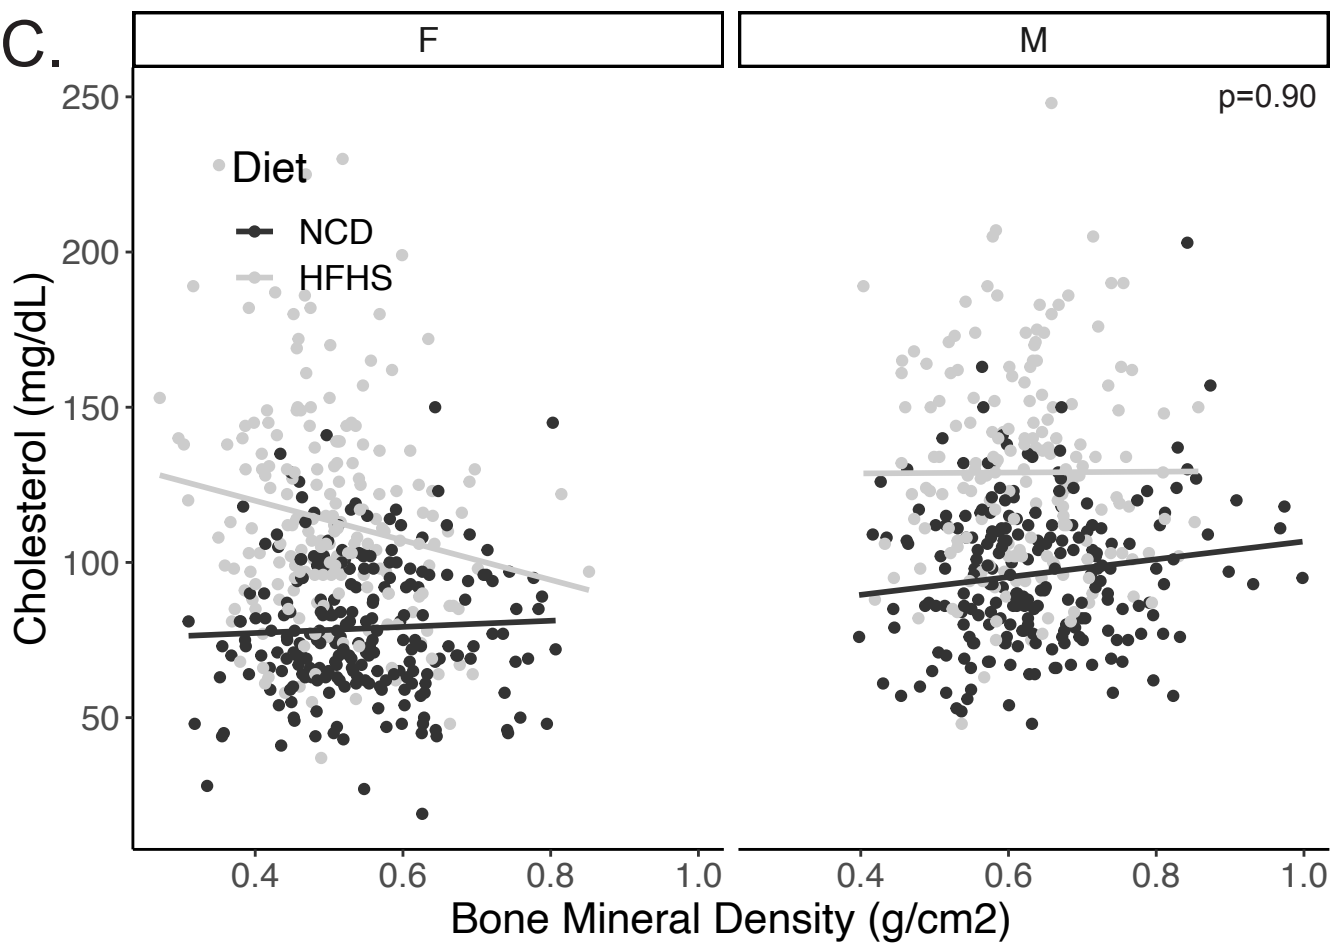

Supplement: media-2.pdf [file media-2.pdf]
